# Supplementary material
Source: publisher figshare collection journal article supplement (https://acs.figshare.com/ndownloader/files/4103440)
Supplement: Supplementary file 1 [file 4103440]

data_si310a_disilene
 
_audit_creation_method            SHELXL-97 
_chemical_name_systematic 
; 
 ? 
; 
_chemical_name_common             ? 
_chemical_melting_point           ? 
_chemical_formula_moiety          ? 
_chemical_formula_sum 
 'C48 H72 Si10' 
_chemical_formula_weight          929.96 
 
loop_ 
 _atom_type_symbol 
 _atom_type_description 
 _atom_type_scat_dispersion_real 
 _atom_type_scat_dispersion_imag 
 _atom_type_scat_source 
 'C'  'C'   0.0033   0.0016 
 'International Tables Vol C Tables 4.2.6.8 and 6.1.1.4' 
 'H'  'H'   0.0000   0.0000 
 'International Tables Vol C Tables 4.2.6.8 and 6.1.1.4' 
 'Si'  'Si'   0.0817   0.0704 
 'International Tables Vol C Tables 4.2.6.8 and 6.1.1.4' 
 
_symmetry_cell_setting            orthorhombic
_symmetry_space_group_name_H-M    Ccca
 
loop_ 
 _symmetry_equiv_pos_as_xyz 
 'x, y, z' 
 '-x+1/2, -y, z' 
 'x+1/2, -y, -z+1/2' 
 '-x, y, -z+1/2' 
 'x+1/2, y+1/2, z' 
 '-x+1, -y+1/2, z' 
 'x+1, -y+1/2, -z+1/2' 
 '-x+1/2, y+1/2, -z+1/2' 
 '-x, -y, -z' 
 'x-1/2, y, -z' 
 '-x-1/2, y, z-1/2' 
 'x, -y, z-1/2' 
 '-x+1/2, -y+1/2, -z' 
 'x, y+1/2, -z' 
 '-x, y+1/2, z-1/2' 
 'x+1/2, -y+1/2, z-1/2' 
 
_cell_length_a                    11.8248(19) 
_cell_length_b                    25.228(4) 
_cell_length_c                    17.106(3) 
_cell_angle_alpha                 90.00 
_cell_angle_beta                  90.00 
_cell_angle_gamma                 90.00 
_cell_volume                      5103.0(14) 
_cell_formula_units_Z             4 
_cell_measurement_temperature     100(2) 
_cell_measurement_reflns_used    6247
_cell_measurement_theta_min        2.24
_cell_measurement_theta_max       27.92
 
_exptl_crystal_description        block
_exptl_crystal_colour             orange
_exptl_crystal_size_max           0.05 
_exptl_crystal_size_mid           0.05 
_exptl_crystal_size_min           0.05 
_exptl_crystal_density_meas       ? 
_exptl_crystal_density_diffrn     1.210 
_exptl_crystal_density_method     'not measured' 
_exptl_crystal_F_000              2000 
_exptl_absorpt_coefficient_mu     0.290 
_exptl_absorpt_correction_type    empirical
_exptl_absorpt_correction_T_min   0.9857 
_exptl_absorpt_correction_T_max   0.9857 
_exptl_absorpt_process_details    
;
SADABS Sheldrick 1996
;
 
_exptl_special_details 
; 
 ? 
; 
 
_diffrn_ambient_temperature       100(2) 
_diffrn_radiation_wavelength      0.71073 
_diffrn_radiation_type            MoK\a 
_diffrn_radiation_source          'Bruker TXS fine-focus rotating anode' 
_diffrn_radiation_monochromator   'Bruker Helios multilayer confocal mirror' 
_diffrn_measurement_device_type   'Bruker APEXII CCD area detector' 
_diffrn_measurement_method        'phi and omega scans' 
_diffrn_detector_area_resol_mean  8.333
_diffrn_standards_number          ? 
_diffrn_standards_interval_count  ? 
_diffrn_standards_interval_time   ? 
_diffrn_standards_decay_%         ? 
_diffrn_reflns_number             11388 
_diffrn_reflns_av_R_equivalents   0.0374 
_diffrn_reflns_av_sigmaI/netI     0.0282 
_diffrn_reflns_limit_h_min        -14 
_diffrn_reflns_limit_h_max        10 
_diffrn_reflns_limit_k_min        -30 
_diffrn_reflns_limit_k_max        29 
_diffrn_reflns_limit_l_min        -20 
_diffrn_reflns_limit_l_max        15 
_diffrn_reflns_theta_min          2.24 
_diffrn_reflns_theta_max          25.00 
_reflns_number_total              2250 
_reflns_number_gt                 1983 
_reflns_threshold_expression      >2sigma(I) 
 
_computing_data_collection        'APEX2 (Bruker AXS, 2006)'
_computing_cell_refinement        'APEX2 (Bruker AXS, 2006)'
_computing_data_reduction         'SAINT (Bruker AXS, 2004)'
_computing_structure_solution     'SHELXS-97 (Sheldrick, 1997)'
_computing_structure_refinement   'SHELXL-97 (Sheldrick, 1997)'
_computing_molecular_graphics     'XSHEL (Bruker AXS,2002)'
_computing_publication_material   'XCIF (Bruker AXS, 2001)' 
 
_refine_special_details 
; 
 Refinement of F^2^ against ALL reflections.  The weighted R-factor wR and 
 goodness of fit S are based on F^2^, conventional R-factors R are based 
 on F, with F set to zero for negative F^2^. The threshold expression of 
 F^2^ > 2sigma(F^2^) is used only for calculating R-factors(gt) etc. and is 
 not relevant to the choice of reflections for refinement.  R-factors based 
 on F^2^ are statistically about twice as large as those based on F, and R- 
 factors based on ALL data will be even larger. 
; 
 
_refine_ls_structure_factor_coef  Fsqd  
_refine_ls_matrix_type            full 
_refine_ls_weighting_scheme       calc  
_refine_ls_weighting_details 
 'calc w=1/[\s^2^(Fo^2^)+(0.0560P)^2^+5.8319P] where P=(Fo^2^+2Fc^2^)/3' 
_atom_sites_solution_primary      direct 
_atom_sites_solution_secondary    difmap 
_atom_sites_solution_hydrogens    geom 
_refine_ls_hydrogen_treatment     constr 
_refine_ls_extinction_method      none 
_refine_ls_extinction_coef        ? 
_refine_ls_number_reflns          2250 
_refine_ls_number_parameters      140 
_refine_ls_number_restraints      0 
_refine_ls_R_factor_all           0.0409 
_refine_ls_R_factor_gt            0.0352 
_refine_ls_wR_factor_ref          0.0985 
_refine_ls_wR_factor_gt           0.0925 
_refine_ls_goodness_of_fit_ref    1.083 
_refine_ls_restrained_S_all       1.083 
_refine_ls_shift/su_max           0.000 
_refine_ls_shift/su_mean          0.000 
 
loop_ 
 _atom_site_label 
 _atom_site_type_symbol 
 _atom_site_fract_x 
 _atom_site_fract_y 
 _atom_site_fract_z 
 _atom_site_U_iso_or_equiv 
 _atom_site_adp_type 
 _atom_site_occupancy 
 _atom_site_symetry_multiplicity 
 _atom_site_calc_flag 
 _atom_site_refinement_flags 
 _atom_site_disorder_assembly 
 _atom_site_disorder_group 
Si1 Si 0.40607(8) 0.2485(5) 0.2392(4) 0.0203(10) Uani 0.50 1 d P . . 
C1 C 0.29617(15) 0.19373(7) 0.26594(11) 0.0183(4) Uani 1 1 d . . . 
C2 C 0.18624(15) 0.22175(7) 0.23549(11) 0.0198(4) Uani 1 1 d . . . 
H1 H 0.1846 0.2212 0.1776 0.024 Uiso 1 1 calc R . . 
H2 H 0.1185 0.2029 0.2551 0.024 Uiso 1 1 calc R . . 
Si2 Si 0.30422(4) 0.12607(2) 0.21761(3) 0.01720(16) Uani 1 1 d . . . 
C3 C 0.15926(16) 0.10395(8) 0.18596(11) 0.0228(4) Uani 1 1 d . . . 
H3 H 0.1287 0.1293 0.1480 0.034 Uiso 1 1 calc R . . 
H4 H 0.1093 0.1022 0.2316 0.034 Uiso 1 1 calc R . . 
H5 H 0.1644 0.0688 0.1618 0.034 Uiso 1 1 calc R . . 
C4 C 0.39181(17) 0.12400(9) 0.12757(12) 0.0272(5) Uani 1 1 d . . . 
H6 H 0.4650 0.1408 0.1377 0.041 Uiso 1 1 calc R . . 
H7 H 0.3529 0.1430 0.0855 0.041 Uiso 1 1 calc R . . 
H8 H 0.4037 0.0871 0.1119 0.041 Uiso 1 1 calc R . . 
C5 C 0.34518(15) 0.08141(8) 0.30079(11) 0.0192(4) Uani 1 1 d . . . 
C6 C 0.38005(15) 0.02863(8) 0.29643(12) 0.0217(4) Uani 1 1 d . . . 
H9 H 0.3908 0.0126 0.2467 0.026 Uiso 1 1 calc R . . 
C7 C 0.39929(16) -0.00079(9) 0.36395(12) 0.0264(5) Uani 1 1 d . . . 
H10 H 0.4241 -0.0365 0.3602 0.032 Uiso 1 1 calc R . . 
C8 C 0.38210(16) 0.02219(8) 0.43693(12) 0.0274(5) Uani 1 1 d . . . 
H11 H 0.3953 0.0022 0.4831 0.033 Uiso 1 1 calc R . . 
C9 C 0.34577(16) 0.07415(9) 0.44239(11) 0.0247(4) Uani 1 1 d . . . 
H12 H 0.3333 0.0894 0.4924 0.030 Uiso 1 1 calc R . . 
C10 C 0.32717(15) 0.10456(8) 0.37499(11) 0.0201(4) Uani 1 1 d . . . 
Si3 Si 0.27725(4) 0.17496(2) 0.37384(3) 0.01927(17) Uani 1 1 d . . . 
C11 C 0.12321(16) 0.17481(8) 0.40174(12) 0.0246(4) Uani 1 1 d . . . 
H13 H 0.0806 0.1532 0.3644 0.037 Uiso 1 1 calc R . . 
H14 H 0.0942 0.2112 0.4010 0.037 Uiso 1 1 calc R . . 
H15 H 0.1147 0.1600 0.4543 0.037 Uiso 1 1 calc R . . 
C12 C 0.35760(17) 0.21402(9) 0.44804(12) 0.0283(5) Uani 1 1 d . . . 
H16 H 0.3424 0.1998 0.5003 0.043 Uiso 1 1 calc R . . 
H17 H 0.3338 0.2512 0.4459 0.043 Uiso 1 1 calc R . . 
H18 H 0.4387 0.2116 0.4369 0.043 Uiso 1 1 calc R . . 
 
loop_ 
 _atom_site_aniso_label 
 _atom_site_aniso_U_11 
 _atom_site_aniso_U_22 
 _atom_site_aniso_U_33 
 _atom_site_aniso_U_23 
 _atom_site_aniso_U_13 
 _atom_site_aniso_U_12 
Si1 0.0091(4) 0.0170(11) 0.035(3) 0.000(3) -0.0016(6) 0.0004(7) 
C1 0.0115(9) 0.0193(9) 0.0241(10) 0.0004(8) -0.0016(7) -0.0003(7) 
C2 0.0098(9) 0.0229(10) 0.0265(10) 0.0022(8) -0.0003(7) -0.0010(7) 
Si2 0.0117(3) 0.0201(3) 0.0198(3) 0.00078(19) 0.00033(19) -0.00043(19) 
C3 0.0170(9) 0.0255(10) 0.0260(10) -0.0010(8) -0.0023(8) -0.0015(8) 
C4 0.0208(11) 0.0341(12) 0.0266(11) 0.0044(8) 0.0053(8) 0.0046(9) 
C5 0.0097(9) 0.0223(10) 0.0255(10) 0.0024(8) -0.0014(7) -0.0027(7) 
C6 0.0125(9) 0.0246(10) 0.0280(10) -0.0006(8) 0.0003(7) -0.0021(8) 
C7 0.0139(9) 0.0246(10) 0.0407(12) 0.0057(9) -0.0018(8) 0.0003(8) 
C8 0.0157(9) 0.0343(12) 0.0322(11) 0.0131(9) -0.0043(8) -0.0037(8) 
C9 0.0170(9) 0.0336(12) 0.0234(10) 0.0020(8) -0.0015(8) -0.0044(8) 
C10 0.0108(9) 0.0258(10) 0.0238(10) -0.0002(8) -0.0015(7) -0.0019(8) 
Si3 0.0129(3) 0.0226(3) 0.0223(3) -0.0029(2) -0.00088(19) -0.0007(2) 
C11 0.0176(10) 0.0332(11) 0.0229(10) -0.0012(8) 0.0010(8) -0.0011(8) 
C12 0.0201(10) 0.0325(12) 0.0323(11) -0.0083(9) -0.0036(8) -0.0007(8) 
 
_geom_special_details 
; 
 All esds (except the esd in the dihedral angle between two l.s. planes) 
 are estimated using the full covariance matrix.  The cell esds are taken 
 into account individually in the estimation of esds in distances, angles 
 and torsion angles; correlations between esds in cell parameters are only 
 used when they are defined by crystal symmetry.  An approximate (isotropic) 
 treatment of cell esds is used for estimating esds involving l.s. planes. 
; 
 
loop_ 
 _geom_bond_atom_site_label_1 
 _geom_bond_atom_site_label_2 
 _geom_bond_distance 
 _geom_bond_site_symmetry_2 
 _geom_bond_publ_flag 
Si1 C1 1.952(9) . ? 
Si1 C1 1.954(9) 7_455 ? 
Si1 Si1 2.252(3) 4_655 ? 
C1 C2 1.569(2) . ? 
C1 Si2 1.8991(19) . ? 
C1 Si3 1.918(2) . ? 
C1 Si1 1.954(9) 7_455 ? 
C2 C2 1.509(4) 7_455 ? 
Si2 C4 1.857(2) . ? 
Si2 C5 1.8784(19) . ? 
Si2 C3 1.8821(19) . ? 
C5 C6 1.396(3) . ? 
C5 C10 1.413(3) . ? 
C6 C7 1.392(3) . ? 
C7 C8 1.391(3) . ? 
C8 C9 1.383(3) . ? 
C9 C10 1.402(3) . ? 
C10 Si3 1.872(2) . ? 
Si3 C12 1.867(2) . ? 
Si3 C11 1.883(2) . ? 
 
loop_ 
 _geom_angle_atom_site_label_1 
 _geom_angle_atom_site_label_2 
 _geom_angle_atom_site_label_3 
 _geom_angle 
 _geom_angle_site_symmetry_1 
 _geom_angle_site_symmetry_3 
 _geom_angle_publ_flag 
C1 Si1 C1 95.50(12) . 7_455 ? 
C1 Si1 Si1 128.2(3) . 4_655 ? 
C1 Si1 Si1 131.6(2) 7_455 4_655 ? 
C2 C1 Si2 107.57(12) . . ? 
C2 C1 Si3 109.52(12) . . ? 
Si2 C1 Si3 101.70(9) . . ? 
C2 C1 Si1 98.9(3) . . ? 
Si2 C1 Si1 120.1(2) . . ? 
Si3 C1 Si1 118.55(19) . . ? 
C2 C1 Si1 101.6(3) . 7_455 ? 
Si2 C1 Si1 128.1(2) . 7_455 ? 
Si3 C1 Si1 107.8(2) . 7_455 ? 
Si1 C1 Si1 11.1(3) . 7_455 ? 
C2 C2 C1 108.44(13) 7_455 . ? 
C4 Si2 C5 117.89(9) . . ? 
C4 Si2 C3 105.13(9) . . ? 
C5 Si2 C3 105.96(9) . . ? 
C4 Si2 C1 114.47(9) . . ? 
C5 Si2 C1 102.84(8) . . ? 
C3 Si2 C1 110.24(8) . . ? 
C6 C5 C10 119.12(17) . . ? 
C6 C5 Si2 127.43(15) . . ? 
C10 C5 Si2 113.18(14) . . ? 
C7 C6 C5 120.85(19) . . ? 
C8 C7 C6 119.9(2) . . ? 
C9 C8 C7 120.06(19) . . ? 
C8 C9 C10 120.80(19) . . ? 
C9 C10 C5 119.26(19) . . ? 
C9 C10 Si3 125.26(15) . . ? 
C5 C10 Si3 115.48(14) . . ? 
C12 Si3 C10 109.46(9) . . ? 
C12 Si3 C11 108.72(9) . . ? 
C10 Si3 C11 107.49(9) . . ? 
C12 Si3 C1 117.67(9) . . ? 
C10 Si3 C1 101.98(8) . . ? 
C11 Si3 C1 110.93(8) . . ? 
 
loop_ 
 _geom_torsion_atom_site_label_1 
 _geom_torsion_atom_site_label_2 
 _geom_torsion_atom_site_label_3 
 _geom_torsion_atom_site_label_4 
 _geom_torsion 
 _geom_torsion_site_symmetry_1 
 _geom_torsion_site_symmetry_2 
 _geom_torsion_site_symmetry_3 
 _geom_torsion_site_symmetry_4 
 _geom_torsion_publ_flag 
C1 Si1 C1 C2 21.2(2) 7_455 . . . ? 
Si1 Si1 C1 C2 178.7(4) 4_655 . . . ? 
C1 Si1 C1 Si2 137.6(2) 7_455 . . . ? 
Si1 Si1 C1 Si2 -64.9(6) 4_655 . . . ? 
C1 Si1 C1 Si3 -96.8(2) 7_455 . . . ? 
Si1 Si1 C1 Si3 60.7(5) 4_655 . . . ? 
C1 Si1 C1 Si1 -84(2) 7_455 . . 7_455 ? 
Si1 Si1 C1 Si1 74(3) 4_655 . . 7_455 ? 
Si2 C1 C2 C2 -172.45(15) . . . 7_455 ? 
Si3 C1 C2 C2 77.80(18) . . . 7_455 ? 
Si1 C1 C2 C2 -46.9(3) . . . 7_455 ? 
Si1 C1 C2 C2 -36.0(3) 7_455 . . 7_455 ? 
C2 C1 Si2 C4 94.91(13) . . . . ? 
Si3 C1 Si2 C4 -150.04(9) . . . . ? 
Si1 C1 Si2 C4 -16.9(3) . . . . ? 
Si1 C1 Si2 C4 -26.1(3) 7_455 . . . ? 
C2 C1 Si2 C5 -135.98(12) . . . . ? 
Si3 C1 Si2 C5 -20.93(10) . . . . ? 
Si1 C1 Si2 C5 112.2(2) . . . . ? 
Si1 C1 Si2 C5 103.0(3) 7_455 . . . ? 
C2 C1 Si2 C3 -23.36(15) . . . . ? 
Si3 C1 Si2 C3 91.69(10) . . . . ? 
Si1 C1 Si2 C3 -135.1(2) . . . . ? 
Si1 C1 Si2 C3 -144.4(3) 7_455 . . . ? 
C4 Si2 C5 C6 -42.2(2) . . . . ? 
C3 Si2 C5 C6 75.11(18) . . . . ? 
C1 Si2 C5 C6 -169.15(16) . . . . ? 
C4 Si2 C5 C10 143.90(14) . . . . ? 
C3 Si2 C5 C10 -98.81(15) . . . . ? 
C1 Si2 C5 C10 16.93(15) . . . . ? 
C10 C5 C6 C7 -1.3(3) . . . . ? 
Si2 C5 C6 C7 -174.92(14) . . . . ? 
C5 C6 C7 C8 1.0(3) . . . . ? 
C6 C7 C8 C9 0.1(3) . . . . ? 
C7 C8 C9 C10 -0.8(3) . . . . ? 
C8 C9 C10 C5 0.5(3) . . . . ? 
C8 C9 C10 Si3 179.57(14) . . . . ? 
C6 C5 C10 C9 0.6(3) . . . . ? 
Si2 C5 C10 C9 175.07(14) . . . . ? 
C6 C5 C10 Si3 -178.59(13) . . . . ? 
Si2 C5 C10 Si3 -4.12(18) . . . . ? 
C9 C10 Si3 C12 45.21(19) . . . . ? 
C5 C10 Si3 C12 -135.66(14) . . . . ? 
C9 C10 Si3 C11 -72.72(18) . . . . ? 
C5 C10 Si3 C11 106.41(15) . . . . ? 
C9 C10 Si3 C1 170.56(16) . . . . ? 
C5 C10 Si3 C1 -10.31(16) . . . . ? 
C2 C1 Si3 C12 -107.76(14) . . . . ? 
Si2 C1 Si3 C12 138.63(9) . . . . ? 
Si1 C1 Si3 C12 4.6(3) . . . . ? 
Si1 C1 Si3 C12 1.9(3) 7_455 . . . ? 
C2 C1 Si3 C10 132.51(13) . . . . ? 
Si2 C1 Si3 C10 18.90(10) . . . . ? 
Si1 C1 Si3 C10 -115.2(3) . . . . ? 
Si1 C1 Si3 C10 -117.8(3) 7_455 . . . ? 
C2 C1 Si3 C11 18.30(15) . . . . ? 
Si2 C1 Si3 C11 -95.31(10) . . . . ? 
Si1 C1 Si3 C11 130.6(3) . . . . ? 
Si1 C1 Si3 C11 128.0(3) 7_455 . . . ? 
 
_diffrn_measured_fraction_theta_max    0.998 
_diffrn_reflns_theta_full              25.00 
_diffrn_measured_fraction_theta_full   0.998 
_refine_diff_density_max    0.634 
_refine_diff_density_min   -0.240 
_refine_diff_density_rms    0.065 
#===END
data_silylene
#------------------------------------------------------------------------------
# CHEMICAL DATA 
_chemical_formula_sum                  'C24 H36 Si5 '
_chemical_formula_moiety               'C24 H36 Si5 '
_chemical_formula_weight               464.98
_chemical_melting_point                ?
#------------------------------------------------------------------------------
# CRYSTAL DATA 
_symmetry_cell_setting                 monoclinic
_symmetry_space_group_name_H-M        'P 21         '
_symmetry_Int_Tables_number            4
loop_
_symmetry_equiv_pos_as_xyz
x,y,z
-x,1/2+y,-z
_cell_length_a                         12.045(1)
_cell_length_b                         6.7445(4)
_cell_length_c                         16.898(1)
_cell_angle_alpha                      90.000(1)
_cell_angle_beta                       102.847(1)
_cell_angle_gamma                      90.000(1)
_cell_volume                           1338.4(2)
_cell_formula_units_Z                  2
_cell_measurement_reflns_used          4200
_cell_measurement_theta_min            3.3
_cell_measurement_theta_max            27.9
_cell_measurement_temperature          173.1
#------------------------------------------------------------------------------
_exptl_crystal_description            'Prism'
_exptl_crystal_colour                 'yellow'
_exptl_crystal_size_max                0.200
_exptl_crystal_size_mid                0.200
_exptl_crystal_size_min                0.200
_exptl_crystal_size_rad                ?
_exptl_crystal_density_diffrn          1.154
_exptl_crystal_density_meas            ?
_exptl_crystal_density_method         'not measured'
_exptl_crystal_F_000                   670.00
_exptl_absorpt_coefficient_mu          0.276
_exptl_absorpt_correction_type         multi-scan
_exptl_absorpt_process_details        '(Jacobson, 1998)'
_exptl_absorpt_correction_T_min        0.801
_exptl_absorpt_correction_T_max        0.942
#------------------------------------------------------------------------------
# EXPERIMENTAL DATA 
_diffrn_radiation_type                'Mo K\a'
_diffrn_radiation_wavelength           0.7107
_diffrn_measurement_device_type       'Rigaku/MSC Saturn CCD'
_diffrn_measurement_method             \w
_diffrn_detector_area_resol_mean       28.57
_diffrn_reflns_number                  19805
_diffrn_reflns_av_R_equivalents        0.036
_diffrn_reflns_theta_max               27.86
_diffrn_measured_fraction_theta_max    0.9962
_diffrn_reflns_theta_full              27.86
_diffrn_measured_fraction_theta_full   0.9962
_diffrn_reflns_limit_h_min             -15
_diffrn_reflns_limit_h_max             15
_diffrn_reflns_limit_k_min             -8
_diffrn_reflns_limit_k_max             8
_diffrn_reflns_limit_l_min             -22
_diffrn_reflns_limit_l_max             22
_diffrn_ambient_temperature 173.1
#------------------------------------------------------------------------------
# REFINEMENT DATA 
_refine_special_details
;
Refinement was carried out using all reflections. The weighted 
R-factor (wR) and goodness of fit (S) are based on F^2^. R-factor (gt) are 
based on F. The threshold expression of F^2^ > 2.0 sigma(F^2^) is used only 
for calculating R-factor (gt).
;
_reflns_number_total                   6335
_reflns_number_gt                      5482
_reflns_threshold_expression           F^2^>2.0\s(F^2^)
_refine_ls_structure_factor_coef       Fsqd
_refine_ls_R_factor_gt                 0.0295
_refine_ls_wR_factor_ref               0.0684
_refine_ls_hydrogen_treatment          refall
_refine_ls_number_reflns               6335
_refine_ls_number_parameters           407
_refine_ls_goodness_of_fit_ref         0.839
_refine_ls_weighting_scheme            calc
_refine_ls_weighting_details
   'w = 1/[\s^2^(Fo^2^) + (0.03000(Max(Fo^2^,0) + 2Fc^2^)/3)^2^]'
_refine_ls_shift/su_max                0.0115
_refine_diff_density_max               0.24
_refine_diff_density_min               -0.21
_refine_ls_extinction_method           none
_refine_ls_extinction_coef             ?
_refine_ls_abs_structure_details
   'Flack, H. D. (1983), Acta Cryst. A39, 876-881.  2899 Friedel Pairs'
_refine_ls_abs_structure_Flack         0.12(9)
loop_
_atom_type_symbol
_atom_type_description
_atom_type_scat_dispersion_real
_atom_type_scat_dispersion_imag
_atom_type_scat_source
  'Si' 'Si'  0.082 0.070 
;International Tables for Crystallography
(1992, Vol. C, Tables 4.2.6.8 and 6.1.1.1)
;
  'C' 'C'  0.003 0.002 
;International Tables for Crystallography
(1992, Vol. C, Tables 4.2.6.8 and 6.1.1.1)
;
  'H' 'H'  0.000 0.000 
;International Tables for Crystallography
(1992, Vol. C, Table 6.1.1.2)
;
_chemical_absolute_configuration unk
#------------------------------------------------------------------------------
# ATOMIC COORDINATES AND DISPLACEMENT PARAMETERS 
loop_
_atom_site_label
_atom_site_type_symbol
_atom_site_fract_x
_atom_site_fract_y
_atom_site_fract_z
_atom_site_U_iso_or_equiv
_atom_site_adp_type
_atom_site_occupancy
_atom_site_symmetry_multiplicity
_atom_site_calc_flag
_atom_site_refinement_flags
_atom_site_disorder_assembly
_atom_site_disorder_group
 Si1 Si 0.00309(5) -0.3424(4) -0.74019(3) 0.0229(1) Uani 1.00 1 d . . .
 Si2 Si -0.26155(5) -0.2819(4) -0.75374(3) 0.0258(1) Uani 1.00 1 d . . .
 Si3 Si -0.16582(5) -0.2714(4) -0.90157(3) 0.0253(1) Uani 1.00 1 d . . .
 Si4 Si 0.24380(5) -0.1581(4) -0.74383(4) 0.0273(1) Uani 1.00 1 d . . .
 Si5 Si 0.12924(5) -0.0648(4) -0.61286(3) 0.0232(1) Uani 1.00 1 d . . .
 C1 C -0.1301(2) -0.1975(5) -0.7893(1) 0.0230(5) Uani 1.00 1 d . . .
 C2 C -0.0995(2) 0.0272(5) -0.7763(1) 0.0263(5) Uani 1.00 1 d . . .
 C3 C 0.0257(2) 0.0541(5) -0.7797(1) 0.0255(5) Uani 1.00 1 d . . .
 C4 C 0.0955(2) -0.1114(5) -0.7273(1) 0.0214(5) Uani 1.00 1 d . . .
 C5 C -0.3390(2) -0.4403(5) -0.8395(1) 0.0250(5) Uani 1.00 1 d . . .
 C6 C -0.4355(2) -0.5548(6) -0.8404(1) 0.0325(6) Uani 1.00 1 d . . .
 C7 C -0.4859(2) -0.6640(6) -0.9082(1) 0.0378(6) Uani 1.00 1 d . . .
 C8 C -0.4403(2) -0.6621(6) -0.9760(2) 0.0376(6) Uani 1.00 1 d . . .
 C9 C -0.3434(2) -0.5514(6) -0.9767(1) 0.0305(6) Uani 1.00 1 d . . .
 C10 C -0.2917(2) -0.4385(5) -0.9091(1) 0.0247(5) Uani 1.00 1 d . . .
 C11 C 0.3152(2) -0.2658(5) -0.6428(1) 0.0294(5) Uani 1.00 1 d . . .
 C12 C 0.4140(2) -0.3828(6) -0.6247(2) 0.0391(7) Uani 1.00 1 d . . .
 C13 C 0.4535(2) -0.4606(6) -0.5487(2) 0.0469(7) Uani 1.00 1 d . . .
 C14 C 0.3946(2) -0.4286(6) -0.4886(2) 0.0441(7) Uani 1.00 1 d . . .
 C15 C 0.2971(2) -0.3131(5) -0.5040(1) 0.0341(6) Uani 1.00 1 d . . .
 C16 C 0.2573(2) -0.2286(5) -0.5803(1) 0.0262(5) Uani 1.00 1 d . . .
 C17 C -0.2376(3) -0.4365(7) -0.6595(2) 0.0492(8) Uani 1.00 1 d . . .
 C18 C -0.3496(3) -0.0650(6) -0.7383(2) 0.0487(8) Uani 1.00 1 d . . .
 C19 C -0.0527(2) -0.4081(7) -0.9396(2) 0.0485(9) Uani 1.00 1 d . . .
 C20 C -0.2069(2) -0.0515(6) -0.9678(2) 0.0425(7) Uani 1.00 1 d . . .
 C21 C 0.2524(2) -0.3344(6) -0.8274(2) 0.0439(8) Uani 1.00 1 d . . .
 C22 C 0.3101(2) 0.0800(6) -0.7672(2) 0.0438(8) Uani 1.00 1 d . . .
 C23 C 0.0168(2) -0.1387(6) -0.5581(2) 0.0349(7) Uani 1.00 1 d . . .
 C24 C 0.1647(2) 0.2019(5) -0.5904(1) 0.0331(6) Uani 1.00 1 d . . .
 H1 H -0.153(2) 0.119(3) -0.816(1) 0.021(5) Uiso 1.00 1 calc . . .
 H2 H -0.105(2) 0.070(3) -0.718(1) 0.020(5) Uiso 1.00 1 calc . . .
 H3 H 0.034(2) 0.042(3) -0.837(1) 0.021(5) Uiso 1.00 1 calc . . .
 H4 H 0.049(2) 0.198(4) -0.761(1) 0.027(6) Uiso 1.00 1 calc . . .
 H5 H -0.466(2) -0.558(4) -0.795(1) 0.033(6) Uiso 1.00 1 calc . . .
 H6 H -0.554(3) -0.733(5) -0.907(2) 0.074(9) Uiso 1.00 1 calc . . .
 H7 H -0.473(2) -0.741(5) -1.018(2) 0.065(8) Uiso 1.00 1 calc . . .
 H8 H -0.309(2) -0.547(3) -1.024(1) 0.023(5) Uiso 1.00 1 calc . . .
 H9 H 0.450(2) -0.403(4) -0.665(1) 0.030(6) Uiso 1.00 1 calc . . .
 H10 H 0.518(3) -0.533(5) -0.533(2) 0.071(8) Uiso 1.00 1 calc . . .
 H11 H 0.419(2) -0.485(4) -0.436(1) 0.044(7) Uiso 1.00 1 calc . . .
 H12 H 0.259(2) -0.295(3) -0.463(1) 0.028(6) Uiso 1.00 1 calc . . .
 H13 H -0.305(2) -0.497(4) -0.652(2) 0.047(7) Uiso 1.00 1 calc . . .
 H14 H -0.214(2) -0.373(4) -0.617(2) 0.045(7) Uiso 1.00 1 calc . . .
 H15 H -0.179(3) -0.540(5) -0.658(2) 0.072(9) Uiso 1.00 1 calc . . .
 H16 H -0.365(2) 0.004(4) -0.781(2) 0.048(8) Uiso 1.00 1 calc . . .
 H17 H -0.310(3) 0.013(5) -0.695(2) 0.072(9) Uiso 1.00 1 calc . . .
 H18 H -0.425(2) -0.105(4) -0.725(2) 0.060(8) Uiso 1.00 1 calc . . .
 H19 H -0.081(2) -0.445(4) -0.994(2) 0.063(8) Uiso 1.00 1 calc . . .
 H20 H -0.030(2) -0.523(5) -0.910(2) 0.066(9) Uiso 1.00 1 calc . . .
 H21 H 0.005(2) -0.328(4) -0.938(1) 0.044(7) Uiso 1.00 1 calc . . .
 H22 H -0.144(2) 0.047(4) -0.967(2) 0.057(8) Uiso 1.00 1 calc . . .
 H23 H -0.265(2) 0.012(4) -0.949(2) 0.047(7) Uiso 1.00 1 calc . . .
 H24 H -0.229(2) -0.099(5) -1.020(2) 0.063(8) Uiso 1.00 1 calc . . .
 H25 H 0.216(2) -0.276(5) -0.878(2) 0.065(8) Uiso 1.00 1 calc . . .
 H26 H 0.220(3) -0.455(5) -0.821(2) 0.067(9) Uiso 1.00 1 calc . . .
 H27 H 0.325(3) -0.351(5) -0.827(2) 0.064(8) Uiso 1.00 1 calc . . .
 H28 H 0.385(3) 0.065(4) -0.779(2) 0.061(8) Uiso 1.00 1 calc . . .
 H29 H 0.311(2) 0.161(5) -0.726(2) 0.069(9) Uiso 1.00 1 calc . . .
 H30 H 0.269(2) 0.143(4) -0.813(2) 0.049(7) Uiso 1.00 1 calc . . .
 H31 H -0.046(3) -0.067(5) -0.571(2) 0.067(8) Uiso 1.00 1 calc . . .
 H32 H 0.040(2) -0.137(4) -0.501(2) 0.046(7) Uiso 1.00 1 calc . . .
 H33 H 0.003(2) -0.274(4) -0.568(2) 0.050(7) Uiso 1.00 1 calc . . .
 H34 H 0.225(2) 0.244(4) -0.614(1) 0.051(7) Uiso 1.00 1 calc . . .
 H35 H 0.182(2) 0.221(4) -0.533(2) 0.058(7) Uiso 1.00 1 calc . . .
 H36 H 0.110(3) 0.285(5) -0.610(2) 0.070(9) Uiso 1.00 1 calc . . .

loop_
_atom_site_aniso_label
_atom_site_aniso_U_11
_atom_site_aniso_U_22
_atom_site_aniso_U_33
_atom_site_aniso_U_12
_atom_site_aniso_U_13
_atom_site_aniso_U_23
 Si1  0.0243(3)   0.0178(3)   0.0253(3)   0.0016(2)   0.0029(2)   0.0009(2)  
 Si2  0.0236(3)   0.0324(3)   0.0218(3)   -0.0018(3)  0.0060(2)   0.0005(2)  
 Si3  0.0220(3)   0.0325(3)   0.0220(3)   0.0007(3)   0.0061(2)   0.0023(2)  
 Si4  0.0232(3)   0.0301(3)   0.0301(3)   0.0018(2)   0.0092(2)   -0.0005(3) 
 Si5  0.0239(3)   0.0222(3)   0.0237(3)   -0.0019(2)  0.0055(2)   -0.0024(2) 
 C1   0.0220(9)   0.0228(10)  0.0244(9)   0.0017(7)   0.0053(8)   0.0027(8)  
 C2   0.0282(10)  0.022(1)    0.028(1)    0.0040(8)   0.0060(9)   0.0033(9)  
 C3   0.0287(10)  0.020(1)    0.028(1)    0.0015(8)   0.0065(9)   0.0026(8)  
 C4   0.0217(9)   0.0194(10)  0.0242(9)   0.0010(7)   0.0074(7)   -0.0005(7) 
 C5   0.0236(10)  0.025(1)    0.0247(10)  0.0036(8)   0.0021(8)   0.0026(8)  
 C6   0.027(1)    0.038(1)    0.032(1)    -0.0023(10) 0.0059(9)   0.006(1)   
 C7   0.031(1)    0.035(1)    0.044(1)    -0.008(1)   0.0033(9)   0.002(1)   
 C8   0.039(1)    0.032(1)    0.036(1)    -0.004(1)   -0.0030(10) -0.004(1)  
 C9   0.031(1)    0.030(1)    0.029(1)    0.0029(9)   0.0046(9)   -0.0023(10)
 C10  0.0239(10)  0.023(1)    0.0263(10)  0.0046(8)   0.0034(8)   0.0021(8)  
 C11  0.0232(10)  0.025(1)    0.038(1)    -0.0009(9)  0.0028(8)   0.0002(9)  
 C12  0.028(1)    0.036(1)    0.053(1)    0.0067(10)  0.009(1)    -0.002(1)  
 C13  0.031(1)    0.037(1)    0.067(2)    0.012(1)    0.000(1)    0.009(1)   
 C14  0.042(1)    0.037(1)    0.044(1)    0.002(1)    -0.010(1)   0.009(1)   
 C15  0.036(1)    0.031(1)    0.032(1)    -0.0047(9)  0.0011(9)   0.0013(9)  
 C16  0.0246(10)  0.021(1)    0.0307(9)   -0.0041(7)  0.0009(8)   -0.0002(8) 
 C17  0.040(2)    0.079(2)    0.026(1)    -0.021(2)   0.002(1)    0.016(1)   
 C18  0.041(2)    0.049(2)    0.063(2)    0.001(1)    0.026(1)    -0.013(2)  
 C19  0.033(1)    0.072(2)    0.043(2)    0.004(1)    0.015(1)    -0.017(2)  
 C20  0.044(2)    0.047(2)    0.034(1)    -0.008(1)   0.002(1)    0.016(1)   
 C21  0.039(1)    0.054(2)    0.040(1)    0.010(1)    0.014(1)    -0.011(1)  
 C22  0.037(1)    0.044(1)    0.055(2)    -0.003(1)   0.022(1)    0.010(1)   
 C23  0.036(1)    0.041(1)    0.029(1)    -0.006(1)   0.0123(10)  -0.001(1)  
 C24  0.044(1)    0.025(1)    0.032(1)    -0.004(1)   0.012(1)    -0.0061(10)
#------------------------------------------------------------------------------
_computing_data_collection            'CRYSTALCLEAR'
_computing_cell_refinement            'CRYSTALCLEAR'
_computing_data_reduction             'teXsan Ver. 2.0'
_computing_structure_solution          SIR92
_computing_structure_refinement       'teXsan Ver. 2.0'
_computing_publication_material       'teXsan Ver. 2.0'
_computing_molecular_graphics          ?
#------------------------------------------------------------------------------
_geom_special_details
;
 ?
;
loop_
_geom_bond_atom_site_label_1
_geom_bond_atom_site_label_2
_geom_bond_distance
_geom_bond_site_symmetry_1
_geom_bond_site_symmetry_2
_geom_bond_publ_flag
 Si1     C1      1.904(2)   . . yes
 Si1     C4      1.899(2)   . . yes
 Si2     C1      1.902(2)   . . yes
 Si2     C5      1.873(2)   . . yes
 Si2     C17     1.871(2)   . . yes
 Si2     C18     1.859(3)   . . yes
 Si3     C1      1.915(2)   . . yes
 Si3     C10     1.871(2)   . . yes
 Si3     C19     1.873(2)   . . yes
 Si3     C20     1.858(2)   . . yes
 Si4     C4      1.895(2)   . . yes
 Si4     C11     1.878(2)   . . yes
 Si4     C21     1.867(2)   . . yes
 Si4     C22     1.875(3)   . . yes
 Si5     C4      1.911(2)   . . yes
 Si5     C16     1.877(2)   . . yes
 Si5     C23     1.870(2)   . . yes
 Si5     C24     1.868(2)   . . yes
 C1      C2      1.563(3)   . . yes
 C2      C3      1.533(3)   . . yes
 C3      C4      1.551(3)   . . yes
 C5      C6      1.393(3)   . . yes
 C5      C10     1.416(3)   . . yes
 C6      C7      1.383(3)   . . yes
 C7      C8      1.377(3)   . . yes
 C8      C9      1.388(3)   . . yes
 C9      C10     1.398(3)   . . yes
 C11     C12     1.404(3)   . . yes
 C11     C16     1.413(3)   . . yes
 C12     C13     1.371(3)   . . yes
 C13     C14     1.379(4)   . . yes
 C14     C15     1.385(3)   . . yes
 C15     C16     1.394(3)   . . yes
#------------------------------------------------------------------------------
loop_
_geom_angle_atom_site_label_1
_geom_angle_atom_site_label_2
_geom_angle_atom_site_label_3
_geom_angle
_geom_angle_site_symmetry_1
_geom_angle_site_symmetry_2
_geom_angle_site_symmetry_3
_geom_angle_publ_flag
   C1      Si1     C4      92.56(8)   . . . yes
   C1      Si2     C5      103.43(8)  . . . yes
   C1      Si2     C17     117.0(1)   . . . yes
   C1      Si2     C18     110.5(1)   . . . yes
   C5      Si2     C17     107.3(1)   . . . yes
   C5      Si2     C18     110.8(1)   . . . yes
   C17     Si2     C18     107.7(1)   . . . yes
   C1      Si3     C10     102.98(8)  . . . yes
   C1      Si3     C19     116.6(1)   . . . yes
   C1      Si3     C20     111.1(1)   . . . yes
   C10     Si3     C19     108.7(1)   . . . yes
   C10     Si3     C20     109.67(10) . . . yes
   C19     Si3     C20     107.6(1)   . . . yes
   C4      Si4     C11     100.75(8)  . . . yes
   C4      Si4     C21     115.5(1)   . . . yes
   C4      Si4     C22     110.4(1)   . . . yes
   C11     Si4     C21     110.5(1)   . . . yes
   C11     Si4     C22     113.1(1)   . . . yes
   C21     Si4     C22     106.7(1)   . . . yes
   C4      Si5     C16     100.13(8)  . . . yes
   C4      Si5     C23     116.28(9)  . . . yes
   C4      Si5     C24     110.56(9)  . . . yes
   C16     Si5     C23     109.6(1)   . . . yes
   C16     Si5     C24     111.78(10) . . . yes
   C23     Si5     C24     108.3(1)   . . . yes
   Si1     C1      Si2     112.84(9)  . . . yes
   Si1     C1      Si3     106.27(9)  . . . yes
   Si1     C1      C2      106.6(1)   . . . yes
   Si2     C1      Si3     102.46(9)  . . . yes
   Si2     C1      C2      115.6(1)   . . . yes
   Si3     C1      C2      112.7(1)   . . . yes
   C1      C2      C3      108.2(2)   . . . yes
   C2      C3      C4      107.8(1)   . . . yes
   Si1     C4      Si4     113.22(9)  . . . yes
   Si1     C4      Si5     103.79(8)  . . . yes
   Si1     C4      C3      107.2(1)   . . . yes
   Si4     C4      Si5     100.47(8)  . . . yes
   Si4     C4      C3      116.4(1)   . . . yes
   Si5     C4      C3      115.2(1)   . . . yes
   Si2     C5      C6      126.5(1)   . . . yes
   Si2     C5      C10     114.5(1)   . . . yes
   C6      C5      C10     119.0(2)   . . . yes
   C5      C6      C7      121.0(2)   . . . yes
   C6      C7      C8      120.1(2)   . . . yes
   C7      C8      C9      120.3(2)   . . . yes
   C8      C9      C10     120.6(2)   . . . yes
   Si3     C10     C5      114.7(1)   . . . yes
   Si3     C10     C9      126.2(2)   . . . yes
   C5      C10     C9      119.0(2)   . . . yes
   Si4     C11     C12     127.6(2)   . . . yes
   Si4     C11     C16     114.1(1)   . . . yes
   C12     C11     C16     118.2(2)   . . . yes
   C11     C12     C13     121.3(2)   . . . yes
   C12     C13     C14     120.1(2)   . . . yes
   C13     C14     C15     120.3(2)   . . . yes
   C14     C15     C16     120.4(2)   . . . yes
   Si5     C16     C11     113.3(1)   . . . yes
   Si5     C16     C15     127.1(2)   . . . yes
   C11     C16     C15     119.6(2)   . . . yes
#------------------------------------------------------------------------------
loop_
_geom_torsion_atom_site_label_1
_geom_torsion_atom_site_label_2
_geom_torsion_atom_site_label_3
_geom_torsion_atom_site_label_4
_geom_torsion
_geom_torsion_site_symmetry_1
_geom_torsion_site_symmetry_2
_geom_torsion_site_symmetry_3
_geom_torsion_site_symmetry_4
_geom_torsion_publ_flag
 Si1     C1      Si2     C5      -101.6(1)  . . . . yes
 Si1     C1      Si2     C17     16.0(2)    . . . . yes
 Si1     C1      Si2     C18     139.7(1)   . . . . yes
 Si1     C1      Si3     C10     105.44(9)  . . . . yes
 Si1     C1      Si3     C19     -13.4(2)   . . . . yes
 Si1     C1      Si3     C20     -137.2(1)  . . . . yes
 Si1     C1      C2      C3      34.2(2)    . . . . yes
 Si1     C4      Si4     C11     -80.6(1)   . . . . yes
 Si1     C4      Si4     C21     38.5(2)    . . . . yes
 Si1     C4      Si4     C22     159.7(1)   . . . . yes
 Si1     C4      Si5     C16     85.88(9)   . . . . yes
 Si1     C4      Si5     C23     -32.1(1)   . . . . yes
 Si1     C4      Si5     C24     -156.11(10) . . . . yes
 Si1     C4      C3      C2      35.6(2)    . . . . yes
 Si2     C1      Si1     C4      -139.50(10) . . . . yes
 Si2     C1      Si3     C10     -13.2(1)   . . . . yes
 Si2     C1      Si3     C19     -132.0(1)  . . . . yes
 Si2     C1      Si3     C20     104.2(1)   . . . . yes
 Si2     C1      C2      C3      160.5(1)   . . . . yes
 Si2     C5      C6      C7      179.2(2)   . . . . yes
 Si2     C5      C10     Si3     -2.1(2)    . . . . yes
 Si2     C5      C10     C9      -179.8(1)  . . . . yes
 Si3     C1      Si1     C4      108.98(9)  . . . . yes
 Si3     C1      Si2     C5      12.2(1)    . . . . yes
 Si3     C1      Si2     C17     129.9(1)   . . . . yes
 Si3     C1      Si2     C18     -106.4(1)  . . . . yes
 Si3     C1      C2      C3      -82.1(2)   . . . . yes
 Si3     C10     C5      C6      177.7(1)   . . . . yes
 Si3     C10     C9      C8      -176.6(2)  . . . . yes
 Si4     C4      Si1     C1      -143.06(10) . . . . yes
 Si4     C4      Si5     C16     -31.39(9)  . . . . yes
 Si4     C4      Si5     C23     -149.3(1)  . . . . yes
 Si4     C4      Si5     C24     86.6(1)    . . . . yes
 Si4     C4      C3      C2      163.5(1)   . . . . yes
 Si4     C11     C12     C13     -176.5(2)  . . . . yes
 Si4     C11     C16     Si5     -4.3(2)    . . . . yes
 Si4     C11     C16     C15     175.3(1)   . . . . yes
 Si5     C4      Si1     C1      108.95(9)  . . . . yes
 Si5     C4      Si4     C11     29.48(10)  . . . . yes
 Si5     C4      Si4     C21     148.5(1)   . . . . yes
 Si5     C4      Si4     C22     -90.3(1)   . . . . yes
 Si5     C4      C3      C2      -79.3(2)   . . . . yes
 Si5     C16     C11     C12     178.5(2)   . . . . yes
 Si5     C16     C15     C14     -178.8(2)  . . . . yes
 C1      Si1     C4      C3      -13.4(1)   . . . . yes
 C1      Si2     C5      C6      173.1(2)   . . . . yes
 C1      Si2     C5      C10     -7.1(2)    . . . . yes
 C1      Si3     C10     C5      10.3(2)    . . . . yes
 C1      Si3     C10     C9      -172.2(2)  . . . . yes
 C1      C2      C3      C4      -45.7(2)   . . . . yes
 C2      C1      Si1     C4      -11.5(1)   . . . . yes
 C2      C1      Si2     C5      135.2(1)   . . . . yes
 C2      C1      Si2     C17     -107.1(2)  . . . . yes
 C2      C1      Si2     C18     16.6(2)    . . . . yes
 C2      C1      Si3     C10     -138.1(1)  . . . . yes
 C2      C1      Si3     C19     103.0(2)   . . . . yes
 C2      C1      Si3     C20     -20.8(2)   . . . . yes
 C3      C4      Si4     C11     154.6(1)   . . . . yes
 C3      C4      Si4     C21     -86.3(2)   . . . . yes
 C3      C4      Si4     C22     34.8(2)    . . . . yes
 C3      C4      Si5     C16     -157.3(1)  . . . . yes
 C3      C4      Si5     C23     84.8(2)    . . . . yes
 C3      C4      Si5     C24     -39.3(2)   . . . . yes
 C4      Si4     C11     C12     159.4(2)   . . . . yes
 C4      Si4     C11     C16     -17.5(2)   . . . . yes
 C4      Si5     C16     C11     23.9(2)    . . . . yes
 C4      Si5     C16     C15     -155.5(2)  . . . . yes
 C5      C6      C7      C8      0.5(3)     . . . . yes
 C5      C10     Si3     C19     134.6(2)   . . . . yes
 C5      C10     Si3     C20     -108.0(2)  . . . . yes
 C5      C10     C9      C8      0.7(3)     . . . . yes
 C6      C5      Si2     C17     48.8(2)    . . . . yes
 C6      C5      Si2     C18     -68.5(2)   . . . . yes
 C6      C5      C10     C9      0.0(3)     . . . . yes
 C6      C7      C8      C9      0.3(4)     . . . . yes
 C7      C6      C5      C10     -0.6(3)    . . . . yes
 C7      C8      C9      C10     -0.9(3)    . . . . yes
 C9      C10     Si3     C19     -47.9(2)   . . . . yes
 C9      C10     Si3     C20     69.5(2)    . . . . yes
 C10     C5      Si2     C17     -131.4(2)  . . . . yes
 C10     C5      Si2     C18     111.3(2)   . . . . yes
 C11     C12     C13     C14     1.6(4)     . . . . yes
 C11     C16     Si5     C23     146.7(1)   . . . . yes
 C11     C16     Si5     C24     -93.2(2)   . . . . yes
 C11     C16     C15     C14     1.7(3)     . . . . yes
 C12     C11     Si4     C21     36.8(2)    . . . . yes
 C12     C11     Si4     C22     -82.8(2)   . . . . yes
 C12     C11     C16     C15     -2.0(3)    . . . . yes
 C12     C13     C14     C15     -1.8(4)    . . . . yes
 C13     C12     C11     C16     0.4(3)     . . . . yes
 C13     C14     C15     C16     0.2(3)     . . . . yes
 C15     C16     Si5     C23     -32.8(2)   . . . . yes
 C15     C16     Si5     C24     87.4(2)    . . . . yes
 C16     C11     Si4     C21     -140.1(2)  . . . . yes
 C16     C11     Si4     C22     100.3(2)   . . . . yes
 C16     C11     Si4     C22     100.3(2)   . . . . yes
#------------------------------------------------------------------------------
#===END
